# Supplementary material
Source: publisher site journal article supplement (https://www.dovepress.com/article/358169)
Supplement: Supplementary file 1 [file get_supplementary_file.php]

# 1 **Supplementary materials**

## 2 **Methods**

### 3 **FFPE sample preparation and RNA extraction from CNB samples**

4 The detailed steps of the sample preparation process (tissue sectioning and marking/quantification)  
5 using human PCa FFPE samples were published previously<sup>1</sup>. For all patients, marked cancer-cell  
6 containing areas were scraped from unstained FFPE sections into DNase/RNase-free  
7 microcentrifuge tubes for RNA extraction using a disposables scalpel. A new scalpel was used for  
8 each patient to prevent cross-contamination. If FFPE sections from more than one biopsy were  
9 used for a patient, the tissue samples from the different biopsies were pooled. For most patients,  
10 the cancer area was at least 15 mm<sup>2</sup> with  $\geq 50\%$  epithelial cancer cells. From the scraped tissue  
11 samples, total RNA was extracted using the commercially available High Pure FFPE RNA Micro  
12 Kit (Roche, catalog number: 4823125001) according to the manufacturer's instructions with the  
13 following modifications: 1) For specimens collected less than one year prior to RNA extraction, add  
14 350  $\mu$ l Lysis Buffer and 350  $\mu$ l Binding Buffer, in the homogenisation step to reduce viscosity; 2)  
15 Centrifuge the High Pure Micro filter for 4 minutes instead of 2 minutes at maximum speed before  
16 the RNA elution step. Extracted RNA was immediately subjected to the Prostatype® RT-qPCR  
17 analysis in the same day without storing.

### 18 **One-step RT-qPCR reaction and Gene expression**

19 Total RNA extracted from the FFPE samples were used for gene expression analysis using a four-  
20 plex one-step RT-qPCR. The expression levels of the three biomarker genes F3, IGFBP3 and  
21 VGLL3 as well as the housekeeping gene GAPDH were measured using the commercially  
22 available Prostatype® RT-qPCR kit (Prostatype Genomics AB, Solna, Sweden). All measurements  
23 were conducted using a Roche LightCycler 480 instrument II (Roche Molecular Systems, Inc.), a  
24 qPCR platform on which a colour compensation method was run prior to performing the qPCR  
25 analysis. The sequence information of the respective probes and primers has been reported  
26 previously<sup>2</sup>. The Prostatype® RT-qPCR kit contains a positive and negative control, which were  
27 assayed together with each batch of PCa tissue samples. A batch of RT-qPCR experiments was

28 considered valid only if positive and negative controls were valid. Samples with GAPDH C(t) values  
29 of >28.0 were excluded according to the Prostatype<sup>®</sup> RT-qPCR kits IFU 0018, revision-7<sup>3</sup>. The  
30 expression levels of the genes IGFBP3, F3 and VGLL3 genes in a sample were normalized to that  
31 of GAPDH and presented as delta C(t) ( $\Delta C[t]$ ) values. The  $\Delta C(t)$  value is inversely correlated to the  
32 gene expression level. All samples were run in triplicates and the median  $\Delta C(t)$  value of the  
33 triplicates for each gene was used for the following calculations. If a triplicate was invalid, then the  
34 mean of the two remaining  $\Delta C(t)$  values was used.

35 All steps including FFPE tissue scraping, RNA extraction and Prostatype<sup>®</sup> RT-qPCR analysis were  
36 performed at the Prostatype Genomics AB Quality Control laboratory in Solna, Sweden.

### 37 **Handling of clinical parameters**

38 In cases where no substage of the parameter “tumor stage” was available, it was assumed that  
39 they were of the lowest substage. For example, if “T2” was recorded, it was assumed that this was  
40 “T2a”; if “T3” was recorded, it was assumed that this was “T3a”.

41

### 42 **References**

- 43 1. Peng Z, Andersson K, Lindholm J, et al. Operator dependent choice of prostate cancer  
44 biopsy has limited impact on a gene signature analysis for the highly expressed genes IGFBP3  
45 and F3 in prostate cancer epithelial cells. *PLoS One*. 2014;9(10):e109610.
- 46 2. Peng Z, Skoog L, Hellborg H, et al. An expression signature at diagnosis to estimate  
47 prostate cancer patients' overall survival. *Prostate Cancer Prostatic Dis*. Mar 2014;17(1):81-90.
- 48 3. Prostatype Genomics AB. Prostatype RT qPCR Kit - Instructions for Use. Revision 7.  
49 Solna, Sweden. 2021.

50

51

52

Supplemental figures

Supplemental Figure S1

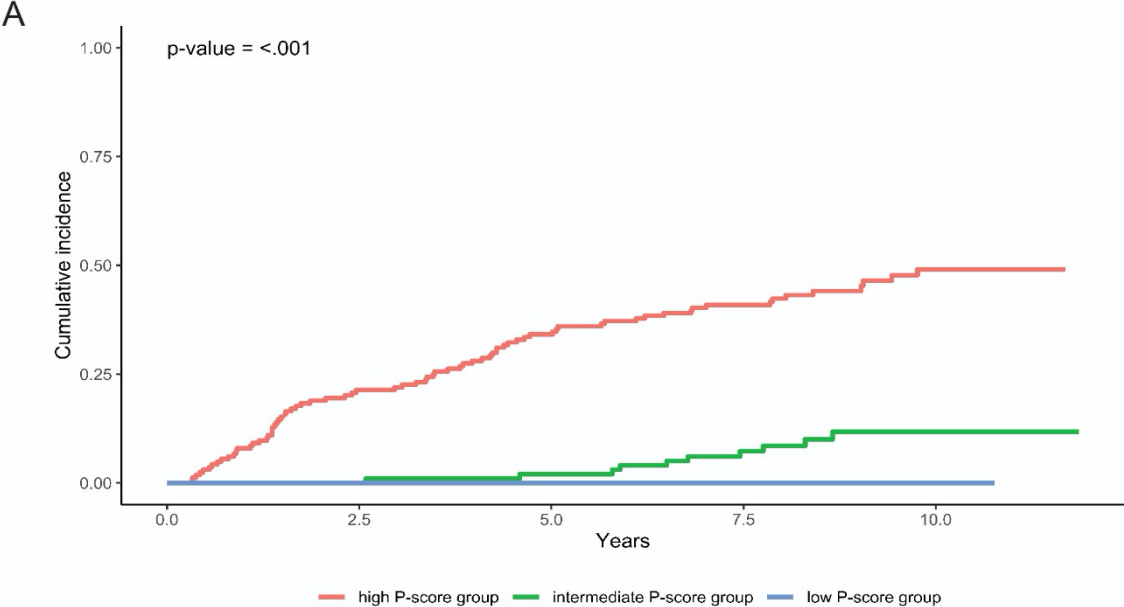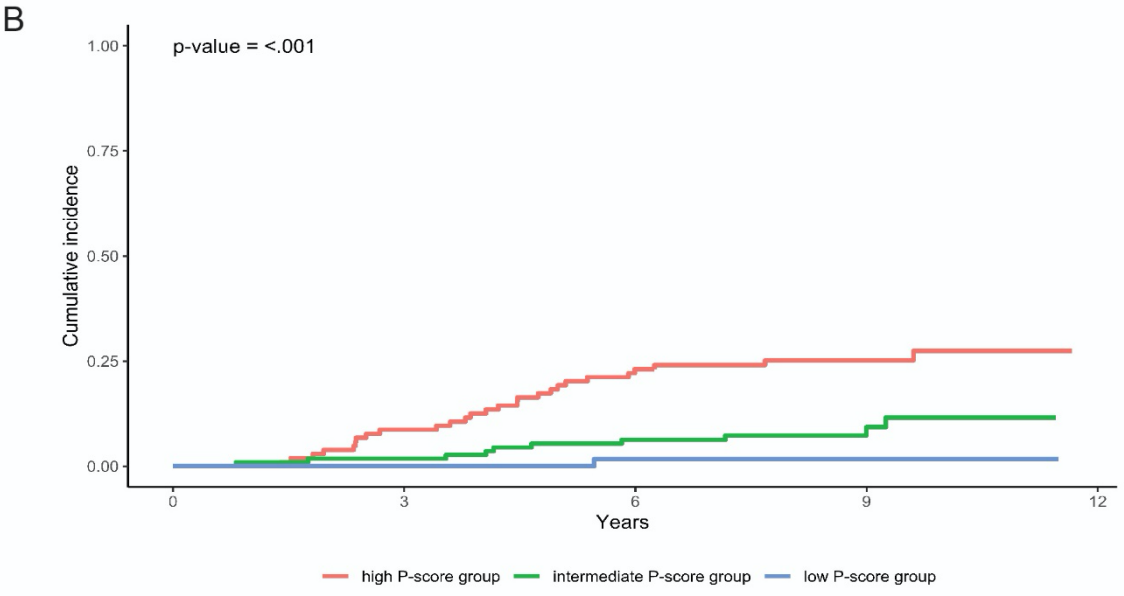

Supplemental Figure S2

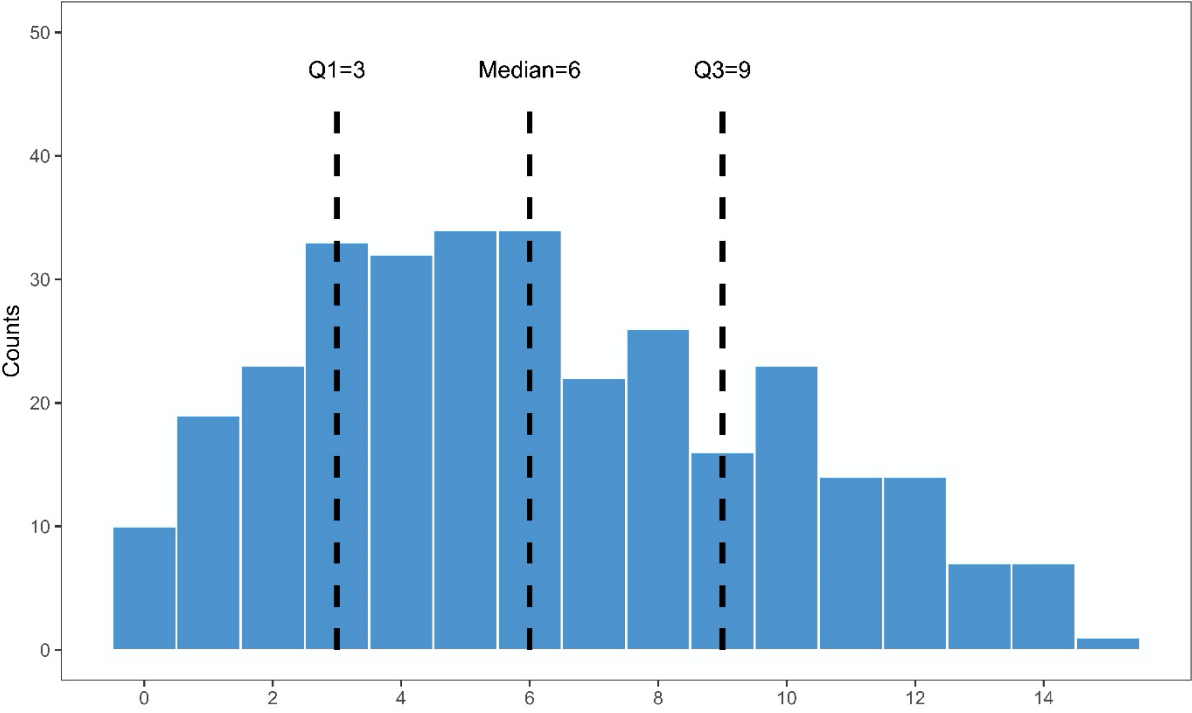

### PCa specific-death within 10 years

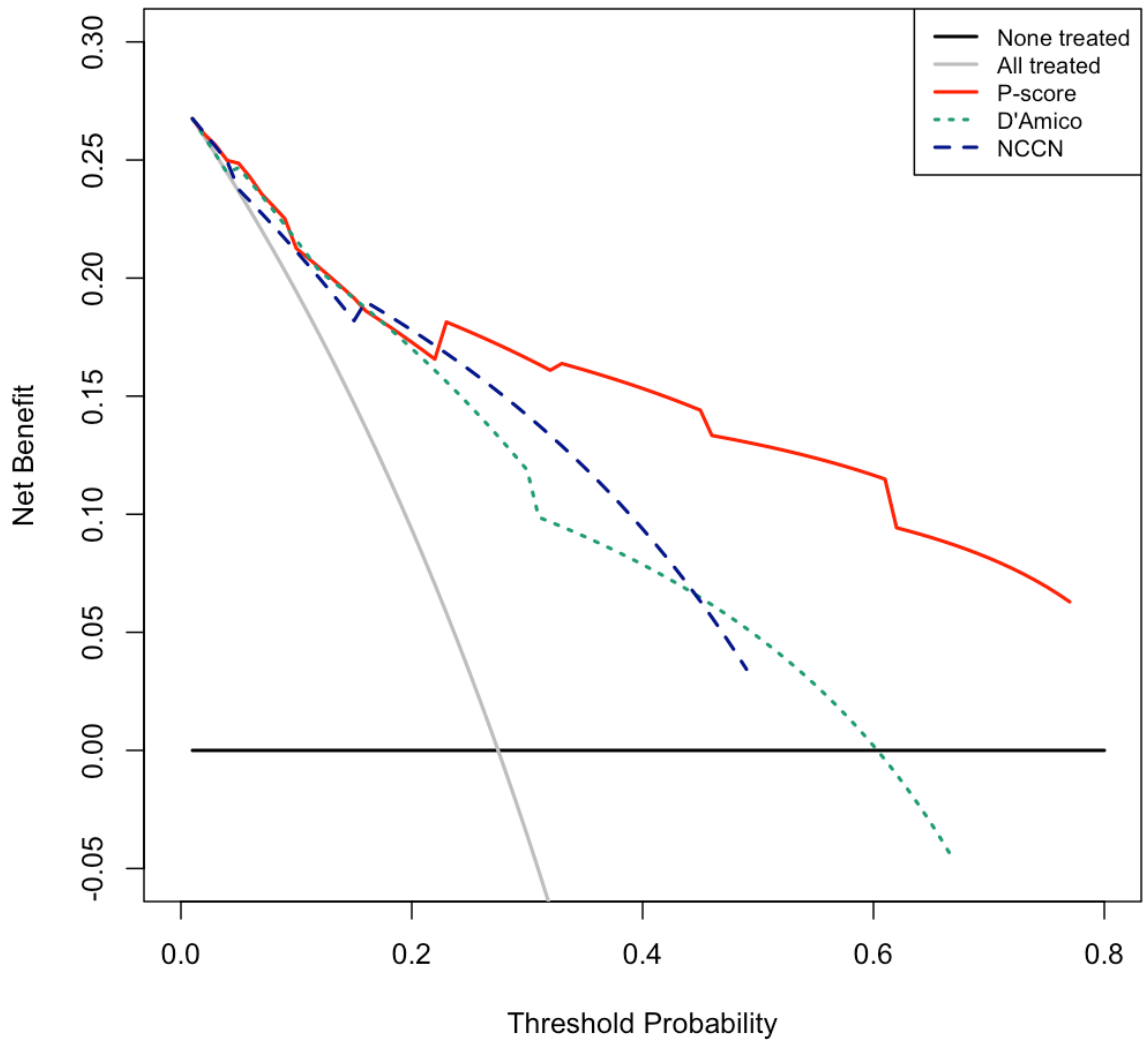

## **Supplemental figure captions**

### **Supplemental Figure S1:**

(A) CIF analysis of the P-score to predict prostate cancer (PCa)-specific mortality versus time in the estimation dataset (n=315).

(B) CIF analysis of the P-score to predict PCa-specific mortality versus time in the validation dataset (n=276).

**Supplemental Figure S2:** Distribution of P-score in the estimation dataset (n=315).

**Supplemental Figure S3:** Comparison of P-score, D'Amico, and NCCN score by decision curve analysis for prostate cancer (PCa)-specific mortality within 10 years in 590 patients. Threshold probabilities: the relative harms of false positive and false negatives.

## Supplemental tables

Supplemental Table S1

| <b>Dataset</b>                             | <b>Patients, n (%)</b> | <b>PCa death, n (%)</b> | <b>HR (95% CI)</b> | <b>P-value</b> |
|--------------------------------------------|------------------------|-------------------------|--------------------|----------------|
| All patients                               | 591 (100)              | 123 (100)               | 1.48 (1.40 – 1.57) | <0.001         |
| Hormone treatment                          | 202 (34)               | 90 (73)                 | 1.35 (1.24 – 1.48) | <0.001         |
| Radical treatment                          | 196 (33)               | 19 (15)                 | 1.47 (1.24 – 1.75) | <0.001         |
| Active surveillance or<br>Watchful waiting | 193 (33)               | 14 (11)                 | 1.60 (1.27 – 2.01) | <0.001         |

Supplemental Table S2

|                           | <b>Patients,<br/>n</b> | <b>PCa death,<br/>n</b> | <b>Scores</b> | <b>C-index<br/>(95% CI)</b> | <b>AUC<br/>(95% CI)</b> |
|---------------------------|------------------------|-------------------------|---------------|-----------------------------|-------------------------|
| <b>All</b>                | 590                    | 123                     | P-score       | 0.82<br>(0.78 – 0.85)       | 0.83<br>(0.78 – 0.88)   |
|                           |                        |                         | D'Amico       | 0.74<br>(0.71 – 0.78)       | 0.76<br>(0.71 – 0.80)   |
|                           |                        |                         | NCCN          | 0.75<br>(0.72 – 0.79)       | 0.76<br>(0.71 – 0.81)   |
| <b>Estimation dataset</b> | 314                    | 85                      | P-score       | 0.83<br>(0.79– 0.87)        | 0.85<br>(0.80 – 0.90)   |
|                           |                        |                         | D'Amico       | 0.75<br>(0.71 – 0.79)       | 0.78<br>(0.72 – 0.83)   |
|                           |                        |                         | NCCN          | 0.76<br>(0.72 – 0.80)       | 0.78<br>(0.72 – 0.84)   |



Supplemental Table S3

|                |                       | <b>Patients,<br/>n</b> | <b>PCa death,<br/>n</b> | <b>Scores</b> | <b>C-index<br/>(95% CI)</b> | <b>AUC<br/>(95% CI)</b> |
|----------------|-----------------------|------------------------|-------------------------|---------------|-----------------------------|-------------------------|
| <b>GS≤7</b>    | Estimation<br>dataset | 235                    | 37                      | P-score       | 0.80<br>(0.73 – 0.87)       | 0.82<br>(0.73 – 0.90)   |
|                |                       |                        |                         | D'Amico       | 0.74<br>(0.67 – 0.81)       | 0.76<br>(0.68 – 0.84)   |
|                |                       |                        |                         | NCCN          | 0.75<br>(0.67 – 0.82)       | 0.75<br>(0.67 – 0.84)   |
|                | Validation<br>dataset | 233                    | 23                      | P-score       | 0.72<br>(0.60 – 0.83)       | 0.71<br>(0.57 – 0.80)   |
|                |                       |                        |                         | D'Amico       | 0.66<br>(0.57 – 0.76)       | 0.65<br>(0.54 – 0.77)   |
|                |                       |                        |                         | NCCN          | 0.67<br>(0.58 – 0.76)       | 0.65<br>(0.54 – 0.76)   |
| <b>GS&gt;7</b> | Estimation<br>dataset | 79                     | 48                      | P-score       | 0.70<br>(0.63 – 0.78)       | 0.758<br>(0.65 – 0.87)  |
|                |                       |                        |                         | D'Amico       | 0.59<br>(0.51 – 0.67)       | 0.60<br>(0.48 – 0.71)   |
|                |                       |                        |                         | NCCN          | 0.58<br>(0.52 – 0.64)       | 0.62<br>(0.53 – 0.70)   |
|                | Validation<br>dataset | 43                     | 15                      | P-score       | 0.68<br>(0.55 – 0.81)       | 0.77<br>(0.69 – 0.93)   |
|                |                       |                        |                         | D'Amico       | 0.64<br>(0.50 – 0.76)       | 0.67<br>(0.51 – 0.83)   |
|                |                       |                        |                         | NCCN          | 0.53<br>(0.44 – 0.58)       | 0.56<br>(0.45 – 0.67)   |

Supplemental Table S4

| <b>Variables</b>                    | <b>C-index</b> |
|-------------------------------------|----------------|
| T-stage                             | 0.69           |
| T-stage + IGFBP3 + F3 + VGLL3       | 0.74           |
| T-stage + PSA                       | 0.75           |
| T-stage + PSA + IGFBP3 + F3 + VGLL3 | 0.76           |
| T-stage + PSA + Gleason             | 0.78           |
| IGFBP3 + F3 + VGLL3                 | 0.71           |
| D'Amico                             | 0.74           |
| D'Amico + IGFBP3 + F3 + VGLL3       | 0.78           |
| NCCN                                | 0.75           |
| NCCN + IGFBP3 + F3 + VGLL3          | 0.80           |
| P-score                             | 0.82           |

## Supplemental table captions

**Supplemental Table S1.** Hazard ratio (HR) of the P-score by treatment group (full dataset, N = 591). 95% confidence interval (CI) and p-value are presented.

**Supplemental Table S2.** Prediction performance comparison of P-score, D'Amico, and NCCN in the full dataset (N=590) and estimation dataset (N=314). Both concordance index (C-index) and area under the curve (AUC) evaluated at 10 years follow-up time are presented. 95% confidence intervals (CI) are shown.

**Supplemental Table S3:** Prediction performance comparison of P-score, D'Amico, and NCCN in subgroups with Gleason score (GS)  $\leq 7$  and GS  $> 7$  in the estimation dataset (N=314) and validation dataset (N=276). Both concordance index (C-index) and area under the curve (AUC) evaluated at 10 years follow-up time are presented. 95% confidence intervals (CI) are shown.

**Supplemental Table S4:** Prediction performance comparison of combinations of different prognostic factors in the full dataset. Concordance index (C-index) calculated by competing risk model.
